# Supplementary material for: Cell-to-cell transmitted alpha-synuclein recapitulates experimental Parkinson’s disease
Source: PubMed Central journal article supplement (PMC10771530; doi:10.1038/s41531-023-00618-6), 2024-01-06

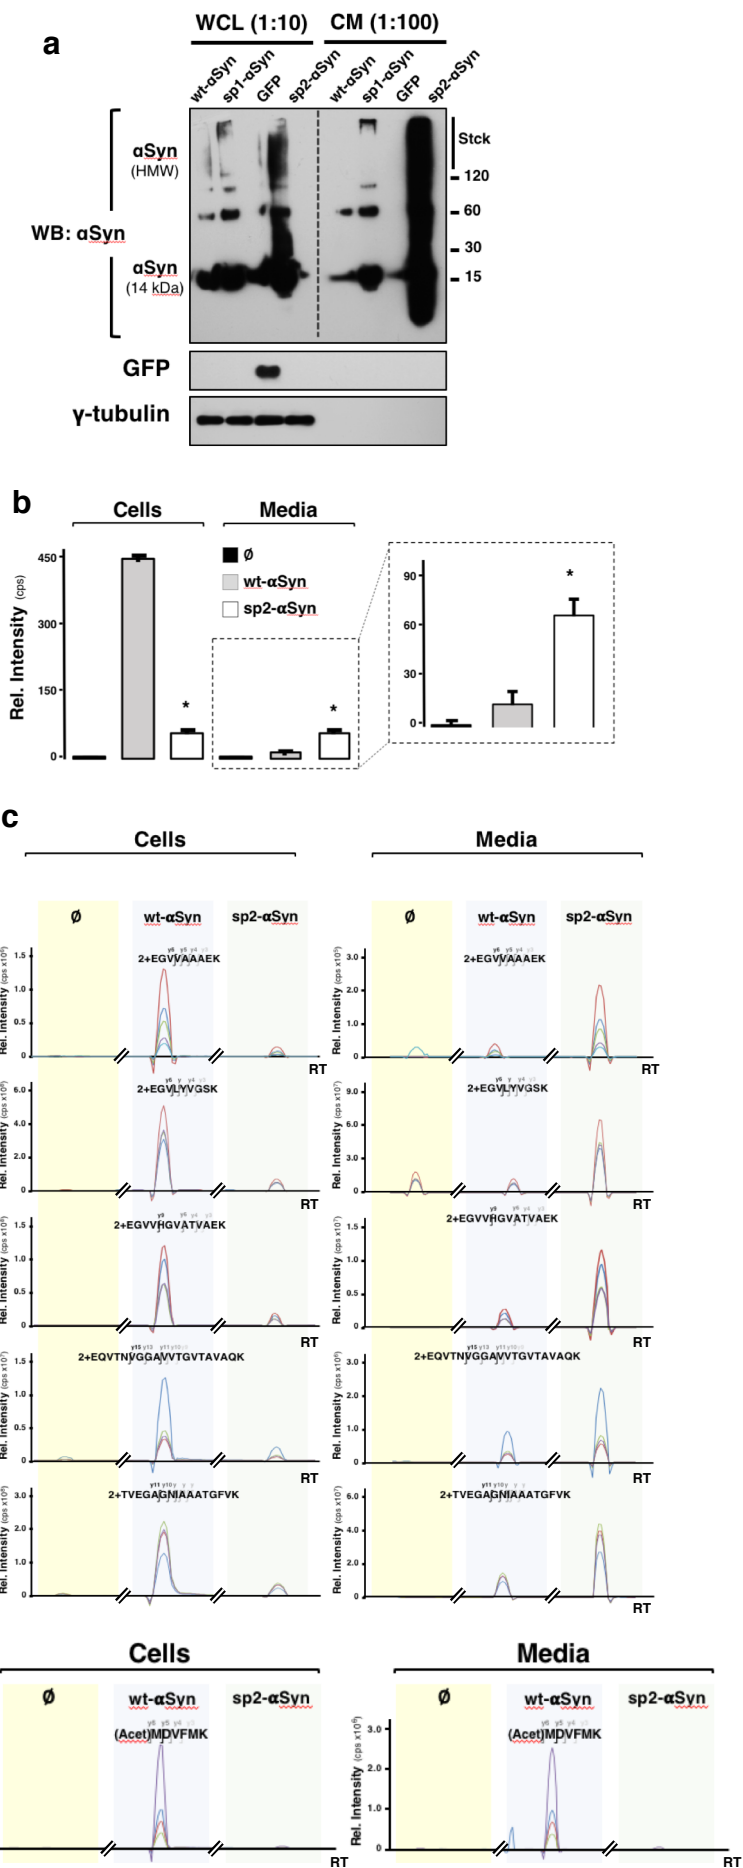



e

$\alpha$ Syn / Golgin 97 / DAPI

sp1- $\alpha$ Syn

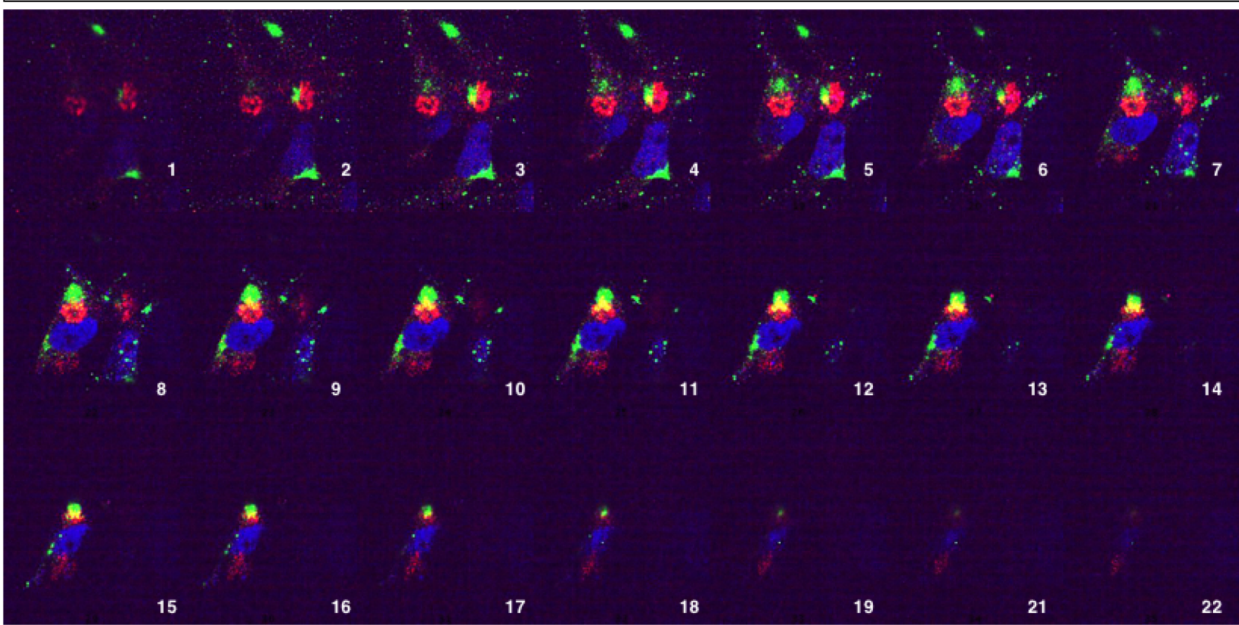

sp2- $\alpha$ Syn

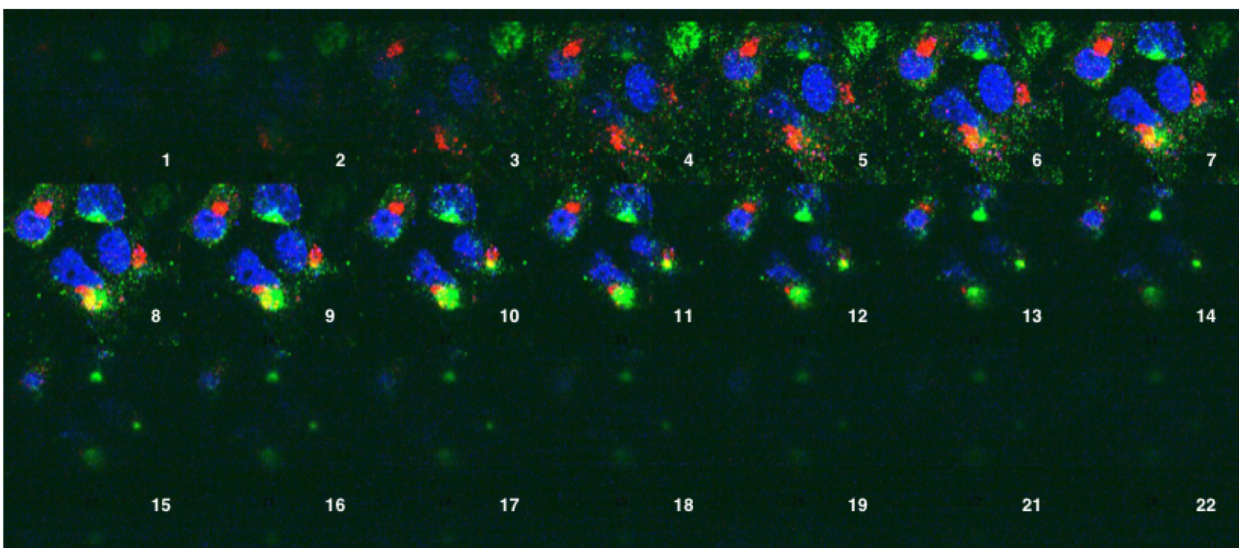

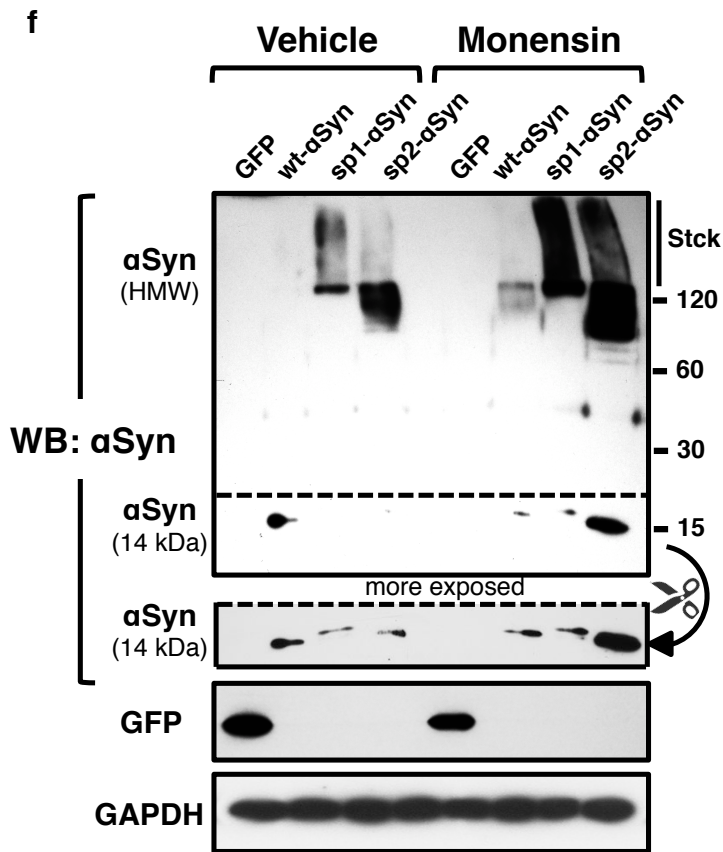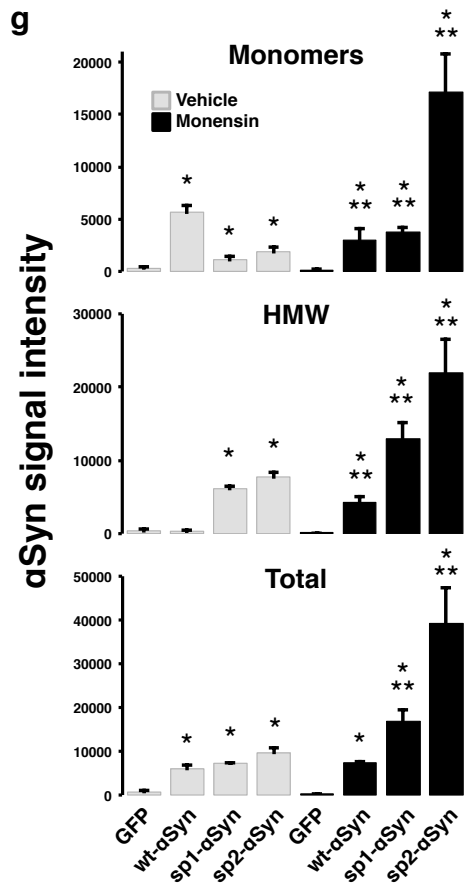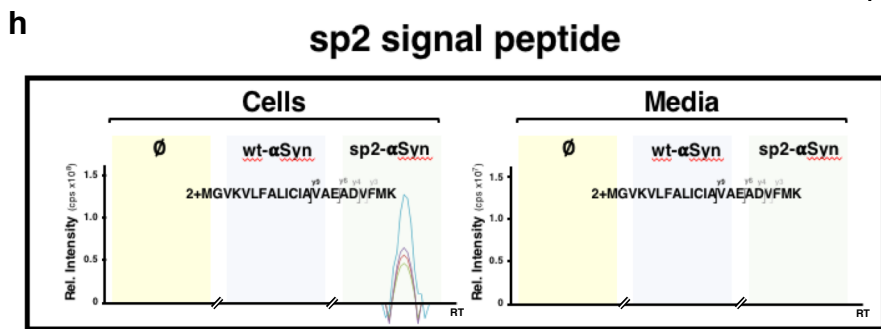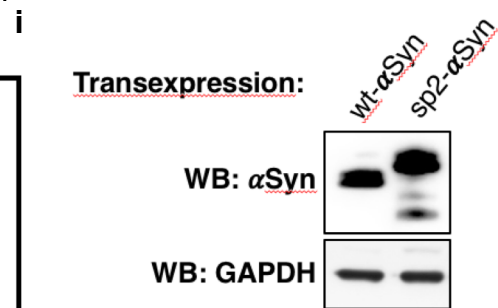

j

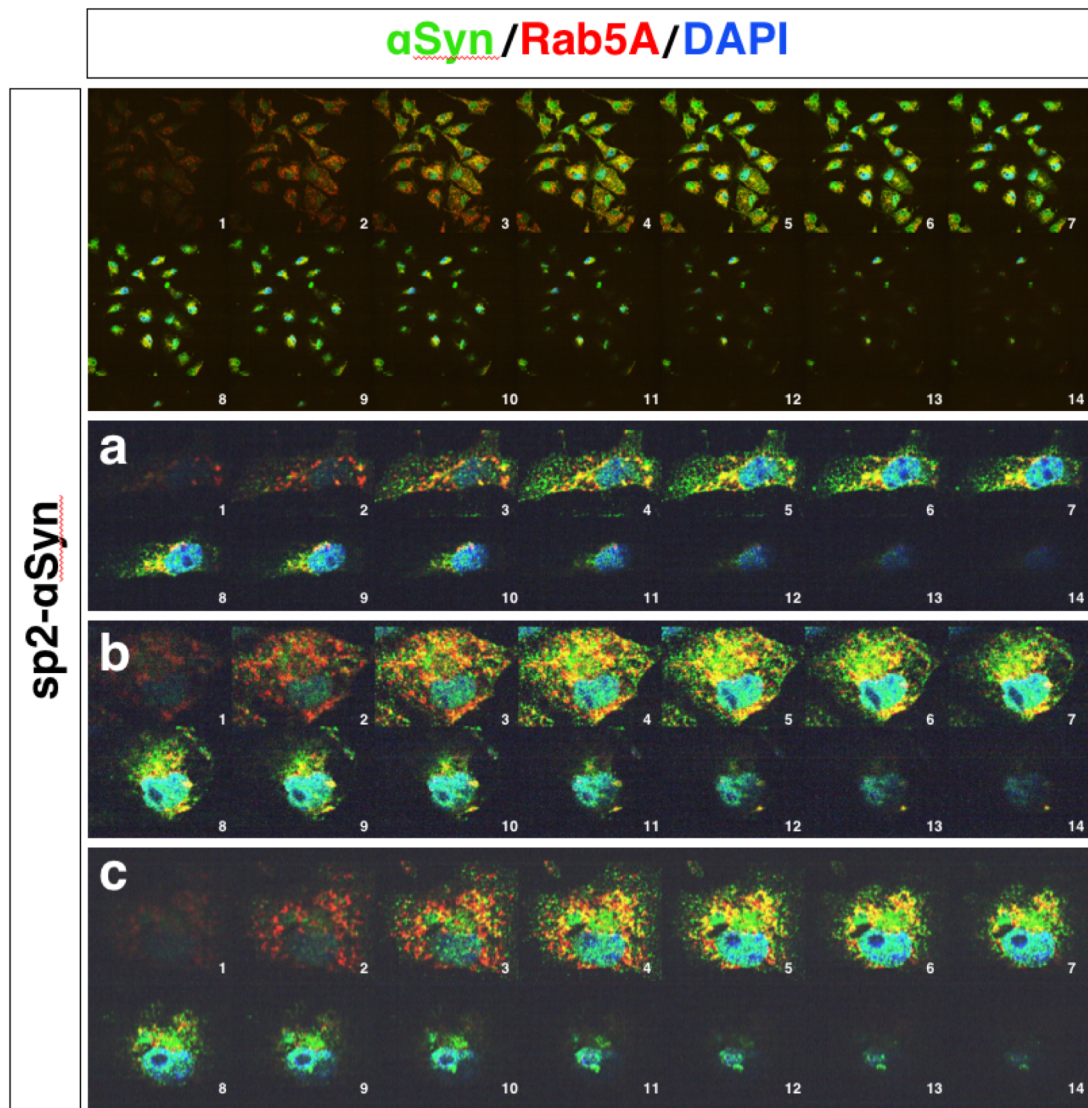

**Supplementary Figure 1. sp-tagged  $\alpha$ Syn are secreted and internalized.** (a) Representative WB analyses of whole cell lysates (WCL, 1:10 from the total lysate) and conditioned media (CM, 1:100 from the total CM) of human neuroblastoma SH-SY5Y cells expressing GFP or wt-, sp1- or sp2- $\alpha$ Syn. Stck, stacking gel. (b) Quantification of the PRM traces of cell lysates (“Cells”) and conditioned media (“Media”) of cells transfected with an empty vector ( $\emptyset$ ) or expression vectors for wt- $\alpha$ Syn or sp2- $\alpha$ Syn. The PRM traces are shown in (c) where the tryptic peptides targeted for PRM experiments are also indicated. Bar plots show averaged counts per seconds (cps) of PRM traces corresponding to the indicated tryptic peptides. Data is shown as the media  $\pm$  SD. \*  $p < 0.05$  compared to empty vector (one-way ANOVA followed by the post hoc Tukey’s test  $n=4$ ). (d) PRM traces of cell lysates (“Cells”) and conditioned media (“Media”) of cells transfected with an empty vector ( $\emptyset$ ) or expression vectors for wt- $\alpha$ Syn or sp2- $\alpha$ Syn. The acetylated  $\alpha$ Syn N-terminus tryptic peptide (sequence: MDVFMK) was targeted for PRM experiments. (e) Z-stack images of selected panels of figure 1c. (f) Representative WB of WCL of Cos7 cells expressing GFP or wt-, sp1- or sp2- $\alpha$ Syn and treated with vehicle or monensin for 16 h. (g) Quantification of the signal intensity of the  $\alpha$ Syn immunoblots of (f). Two areas of the gel were quantified separately, the lower part containing  $\alpha$ Syn monomers and the upper part containing the HMW species. Total signal intensity was calculated as the sum of monomers and HMW. Data is shown as the media  $\pm$  SD. \* and \*\*,  $p < 0.05$  respect GFP and monensin, respectively (one-way ANOVA followed by the post hoc Tukey’s test,  $n=3$ ). (h) PRM traces of cell lysates (“Cells”) and conditioned media (“Media”) of cells transfected with an empty vector ( $\emptyset$ ) or expression vectors for wt- $\alpha$ Syn or sp2- $\alpha$ Syn. The sp2 semi-tryptic peptide was targeted for PRM experiments. Cps, counts per second. RT, retention time. (i) Western blot analyses of whole cell lysates obtained from mammalian cells transexpressed with recombinant wt- $\alpha$ Syn and sp2- $\alpha$ Syn. Anti- $\alpha$ Syn antibodies were used to detect the transexpressed proteins whereas an anti-GAPDH antibody was used as loading control. (j) Z-stack images of selected panels of figure 1f.



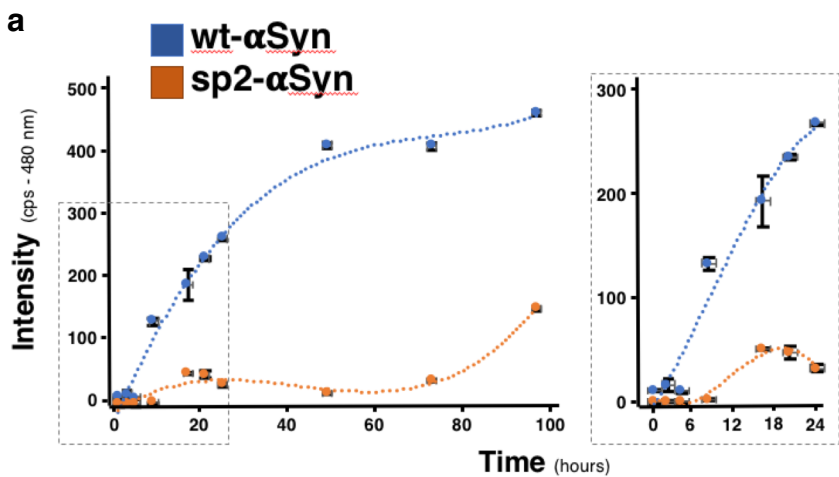

**b**

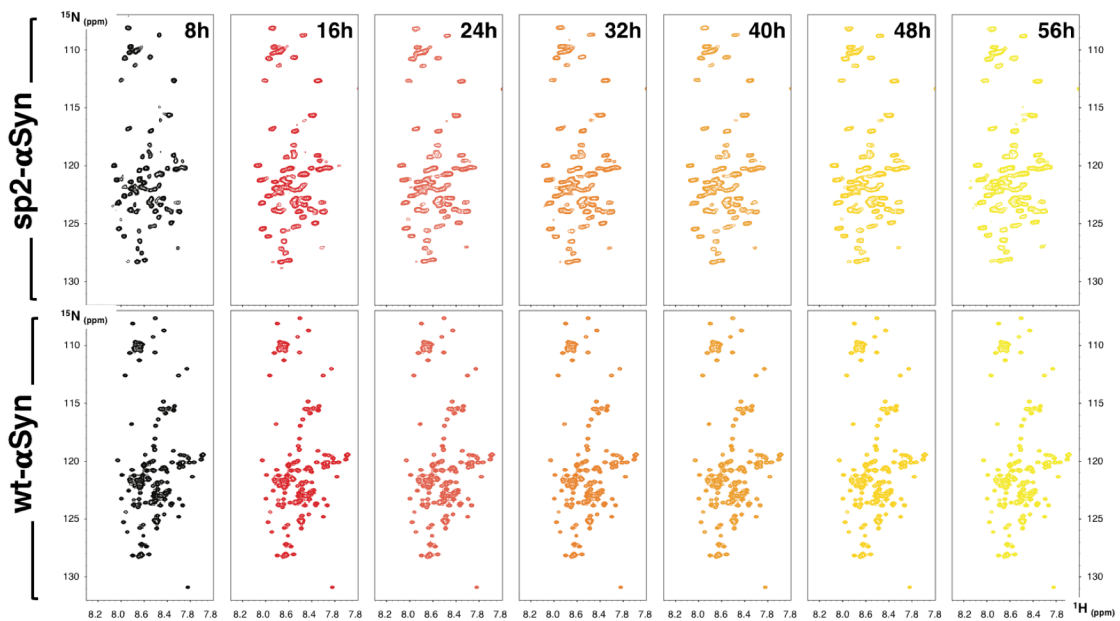

**c**

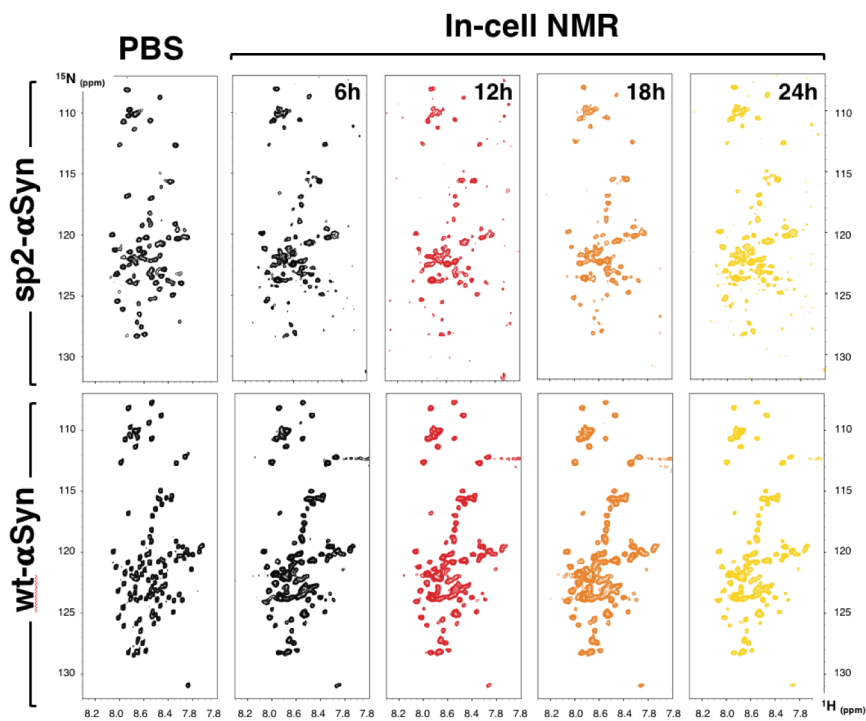

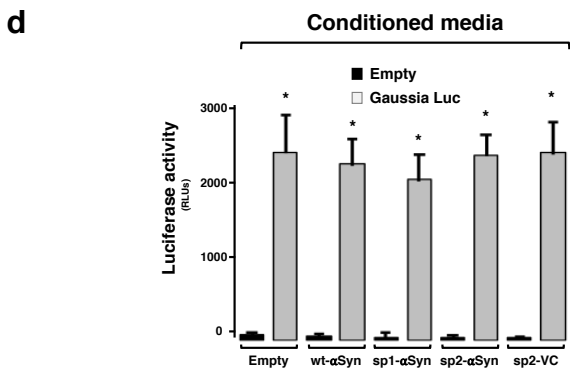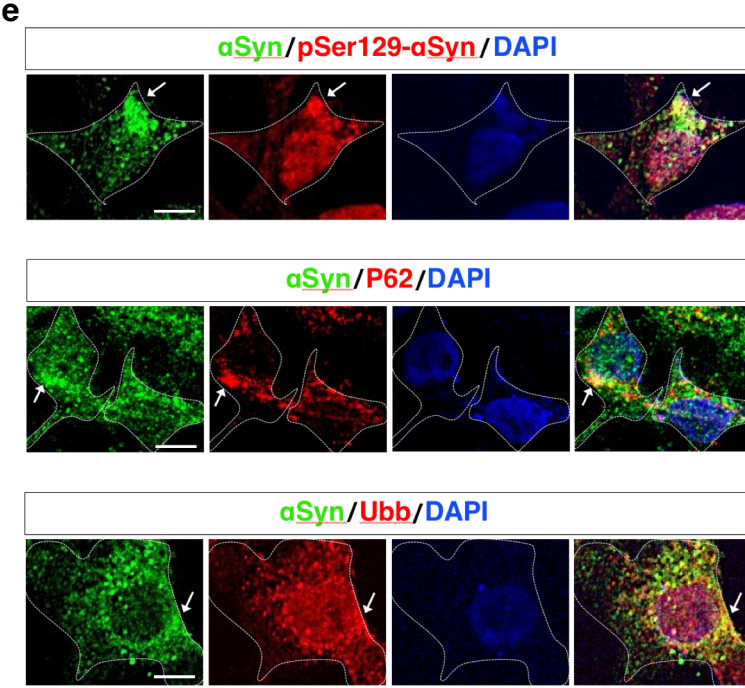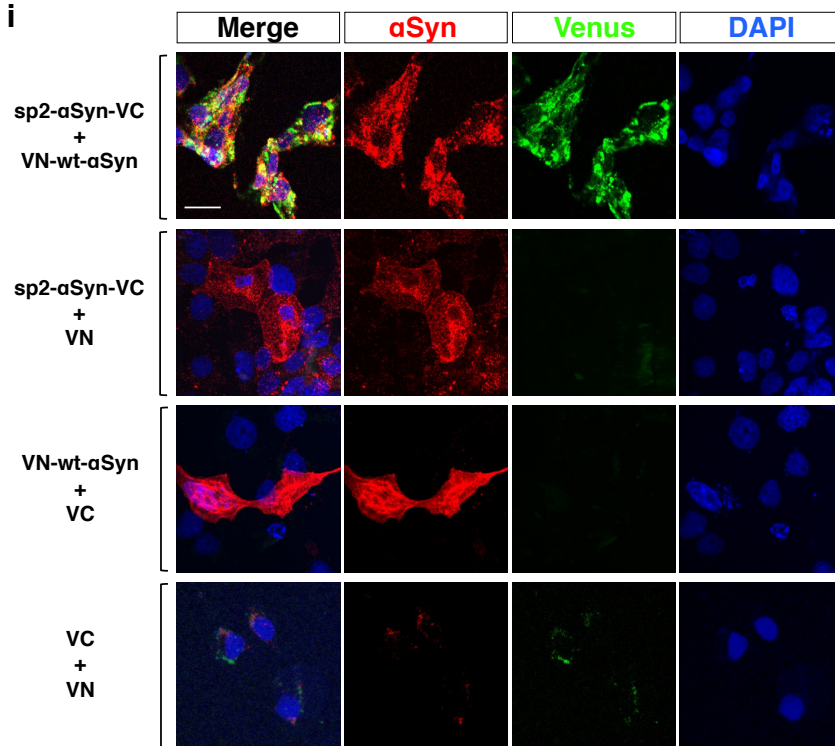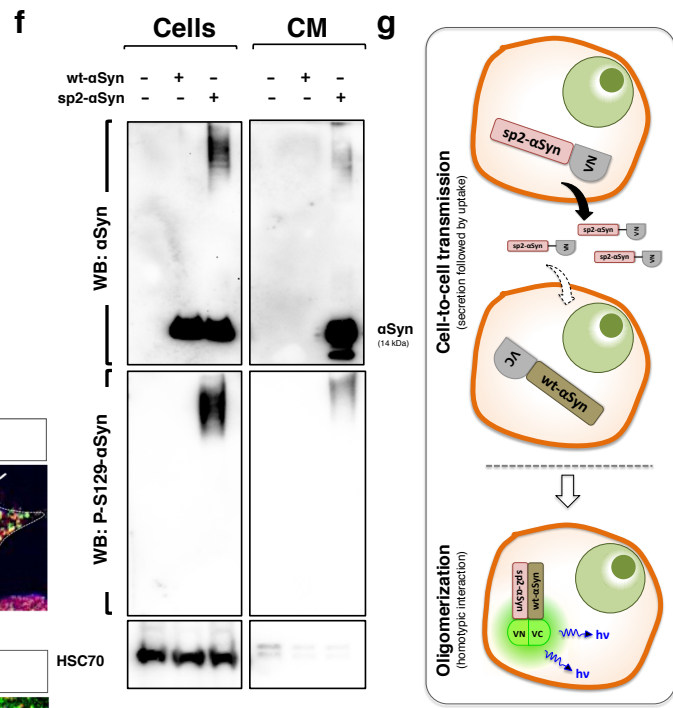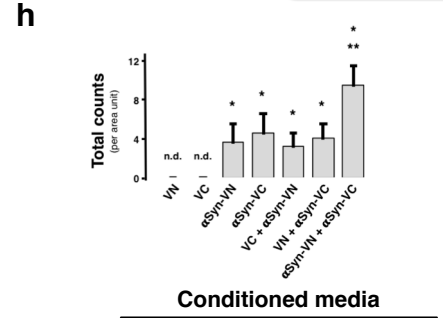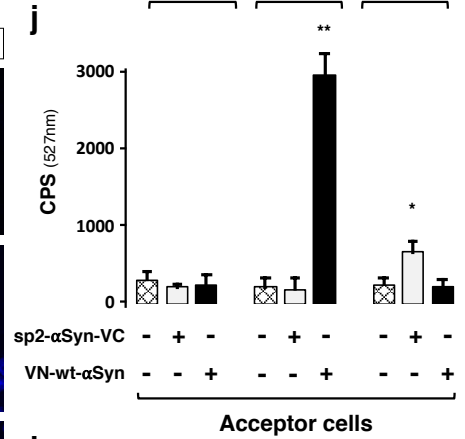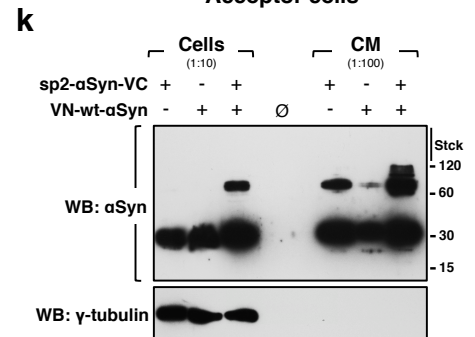

**Supplementary Figure 2. sp2- $\alpha$ Syn is toxic, amyloidogenic and cell-to-cell transmitted.**

(a) Thioflavin-T fluorescence of recombinant wt- $\alpha$ Syn (blue) and sp2- $\alpha$ Syn (orange) incubated in PBS buffer at 37 °C in agitation for the indicated times. On the right a magnification of the 0-24 h is shown. (b) Two dimensional [ $^{15}\text{N},^1\text{H}$ ]-Heteronuclear Multiple Quantum Coherence (HMQC) NMR spectra of  $^{15}\text{N}$ -labeled wt- and sp2- $\alpha$ Syn incubated in PBS buffer for the indicated times. NMR measurements were carried out at 10 °C. (c) Two dimensional [ $^{15}\text{N},^1\text{H}$ ]-HMQC NMR spectra of  $^{15}\text{N}$ -labeled wt- and sp2- $\alpha$ Syn transexpressed in mammalian cells and kept in the NMR tube for the indicated times (“in cell-NMR”). The reference spectra correspond to the same proteins in buffer (first black spectra) is shown (“PBS”). NMR measurements were carried out at 10 °C. (d) Bar graph showing the luciferase activity recovered in CM of cells co-expressing the Gaussia luciferase and wt-, sp1-, sp2- $\alpha$ Syn or the control secreted protein sp2-VC. Data is shown as the media  $\pm$  SD. \*  $p < 0.005$  (one-way ANOVA followed by the *post hoc* Tukey’s test,  $n=5$ ). (e) Cos7 cells expressing sp2- $\alpha$ Syn for 48 h were fixed and subjected to confocal microscopy analyses to visualize  $\alpha$ Syn (green),  $\alpha$ Syn phosphorylated at serine 129, P62 and ubiquitin (all them in red). DAPI (blue) was used for nuclei staining. Scale bar, 10  $\mu\text{m}$ . (f) Western blot analyses of cell lysates (“Cells”) and conditioned media (“CM”) of cells transfected with an empty vector (-) or expression vectors for wt- $\alpha$ Syn or sp2- $\alpha$ Syn. Antibodies against  $\alpha$ Syn and  $\alpha$ Syn phosphorylated at serine 129 were used to detect the modified forms of this protein, whereas an anti-HSC70 antibody were used as loading control. (g) Schematic representation of the bimolecular fluorescence complementation (BiFC) approach used to study sp2- $\alpha$ Syn cell-to-cell propagation, seeded oligomerization and secondary secretion. Note that for visualization purposes the sp2 peptide was not removed from the secreted sp2- $\alpha$ Syn. (h) Cos7 cells expressing wt- $\alpha$ Syn-VC, VN-wt- $\alpha$ Syn or the control proteins VN or VC were grown alone or co-incubated as indicated. After 48 h the cells were fixed and subjected to confocal microscopy analyses to quantify cells containing the reconstituted Venus protein. Very few fluorescent cells (counts) were observed in wt- $\alpha$ Syn-VC and VN-wt- $\alpha$ Syn-expressing cells even in absence of the missing complementary GFP half (bars 3 and 4). Co-cultures of cells expressing wt- $\alpha$ Syn-VC and VN-wt- $\alpha$ Syn (bar 7) yielded few fluorescent cells which were more abundant compared to cells expressing these proteins alone. Data is shown as the media  $\pm$  SD. \*  $p < 0.05$  compared to VN and VC. \*\*  $p < 0.05$  compared to all other conditions. (i) Cos7 cells expressing sp2- $\alpha$ Syn-VC, VN-wt- $\alpha$ Syn or the control protein VC were co-incubated with cells expressing VN-wt- $\alpha$ Syn, VN or VC. After 48 h the cells were fixed and subjected to confocal microscopy analyses to visualize the reconstituted Venus protein. Scale bar, 10  $\mu\text{m}$ . (j) Quantification of luciferase activity in acceptor cells expressing sp2- $\alpha$ Syn-VC (grey bars) or VN-wt- $\alpha$ Syn (black bars). Acceptor cells were treated with conditioned media containing VC-sp2- $\alpha$ Syn or VN-wt- $\alpha$ Syn. Data is shown as the media  $\pm$  SD. \*  $p < 0.05$  compared to Empty. \*\*  $p < 0.01$  compared to cells lacking  $\alpha$ Syn (squared bars). Unpaired, two tails distribution Student’s *t* test, ( $n=5$ ). (k) HeLa cell clones expressing VN-wt- $\alpha$ Syn or sp2- $\alpha$ Syn-VC were co-cultured as indicated. 24 h later the CM was collected and subjected to WB together with the cell lysates (Cells).  $\emptyset$ , empty lane



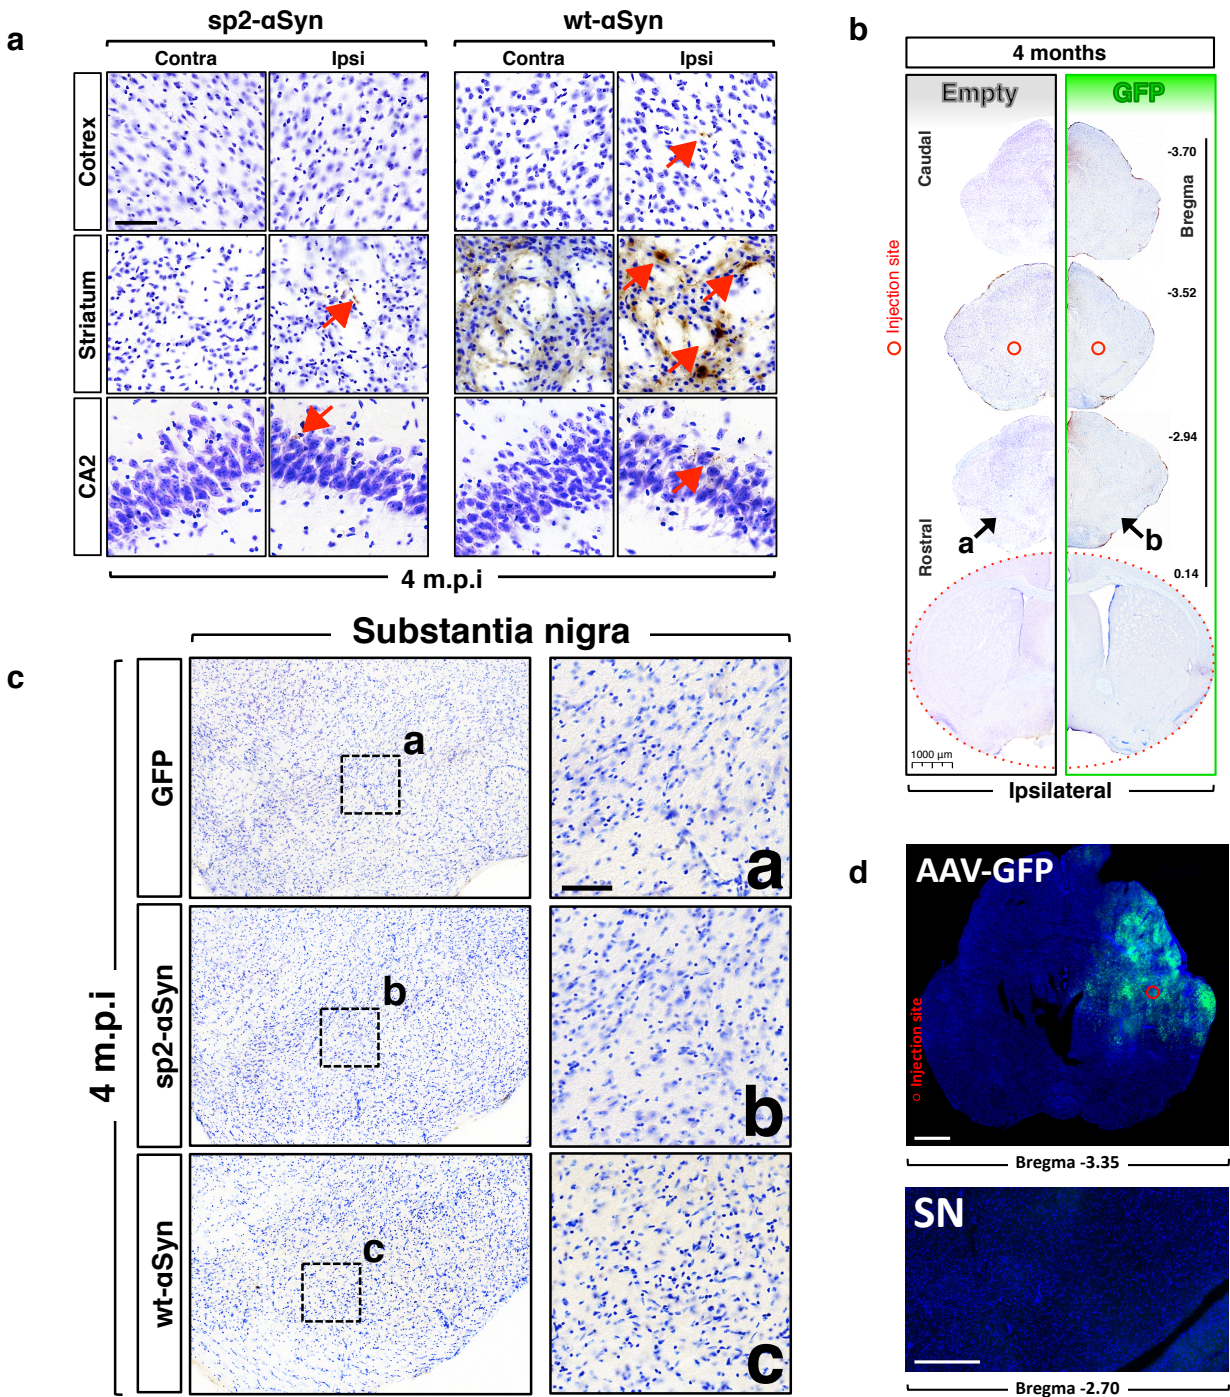

**Supplementary Figure 3. Neuron-derived extracellular  $\alpha$ Syn triggers a robust LB-like pathology in the substantia nigra.** (a) Representative IHC images of coronal sections of cortex, striatum and the CA2 region of the hippocampus (CA2) of wild type mice transduced with AAV-sp2- $\alpha$ Syn or AAV-wt- $\alpha$ Syn for 4 months. Both contralateral (Contra) and ipsilateral (Ipsi) hemispheres are shown. Arrows,  $\alpha$ Syn-positive inclusions found in neuronal bodies and fibers. Scale bar, 100  $\mu$ m. (b) Representative IHC images of consecutive coronal sections of brains of wild type mice (n=6) transduced with an empty AAV9 (grey, Empty) or an AAV9 encoding GFP (green, GFP). Animals were sacrificed at 4 months post injection. Approximate rostrocaudal coordinates taking the bregma as reference are indicated on the right. Only ipsilateral hemispheres are shown. Arrows, substantia nigra. (c) Control IHC images of substantia nigra of wild type mice transduced with AAV-GFP, AAV-sp2- or AAV-wt- $\alpha$ Syn in for 4 months. Primary antibody was omitted in these control experiments. Scale bar, 100  $\mu$ m. (d) Representative fluorescence images of mice expressing eGFP for 4 months in the DMN. The area where the virus was administered and the substantia nigra are shown. Nuclei were stained with DAPI. Scale bar, 100  $\mu$ m.

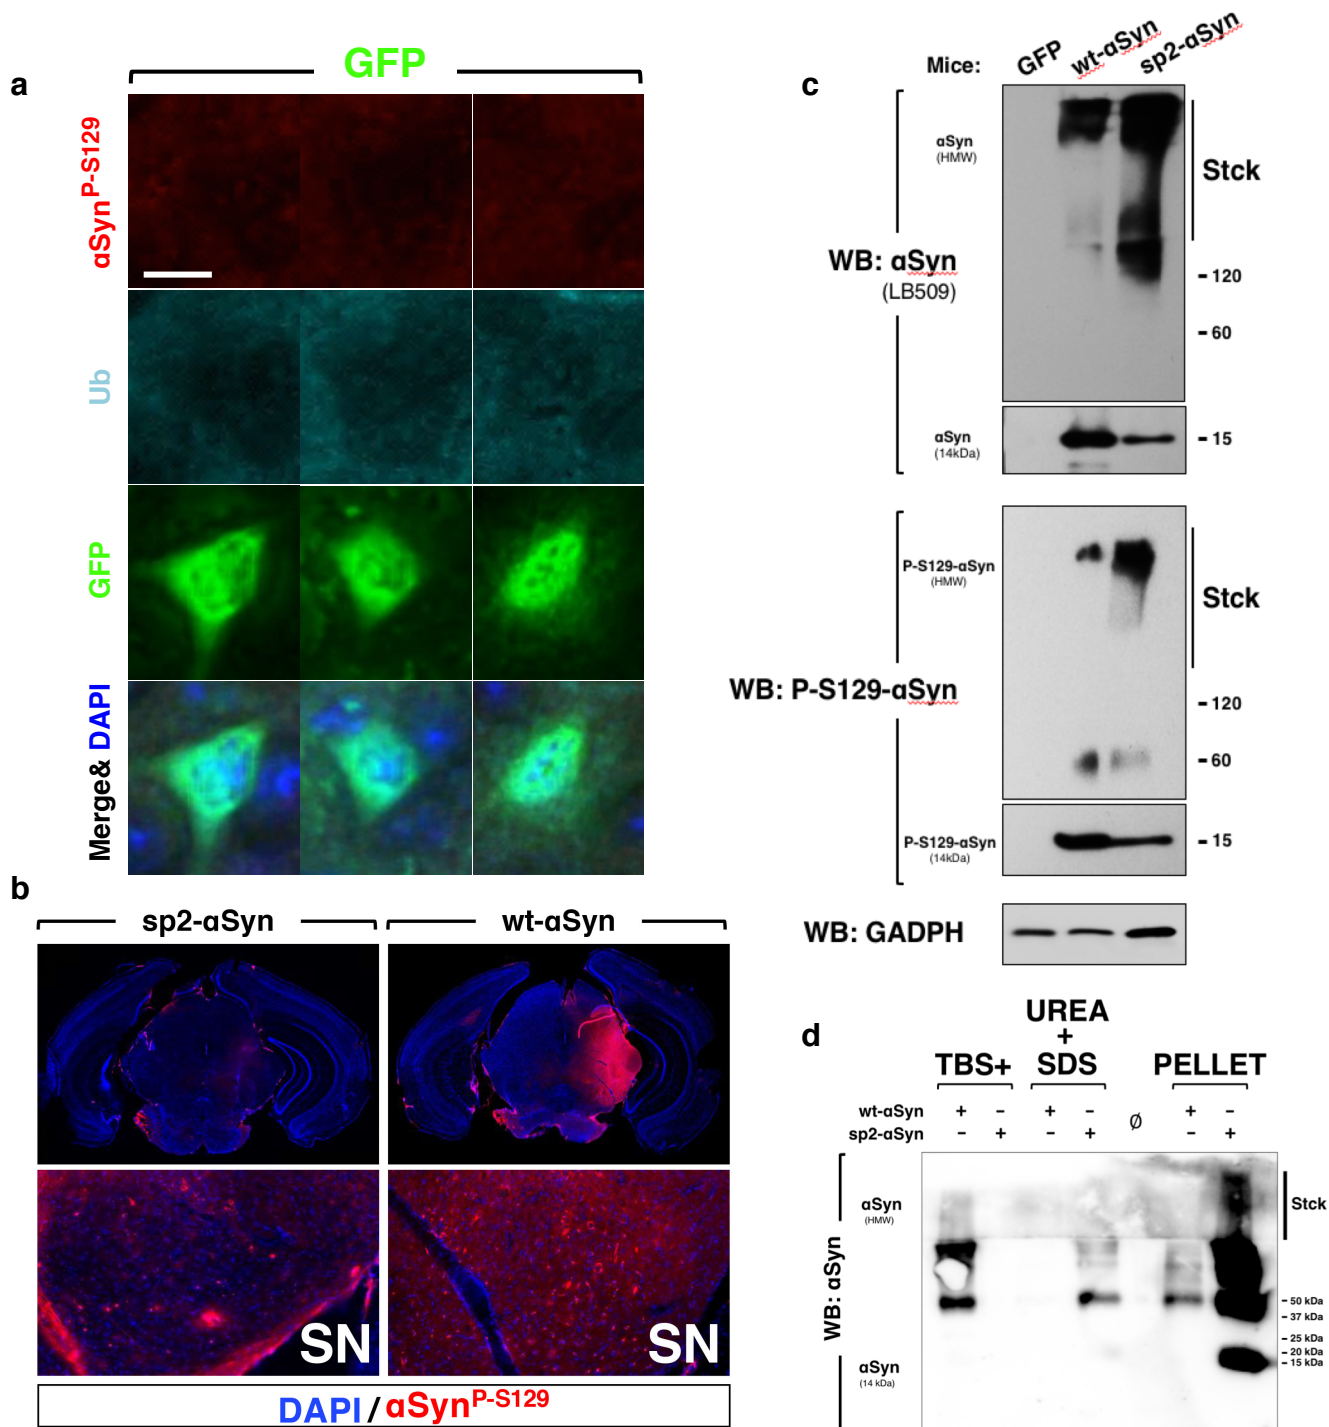

**Supplementary Figure 4. Lewy body-like pathology elicited by *sp2*- and *wt*-αSyn.** (a) Representative double immunofluorescence images of mice expressing GFP for 4 months. Immunostaining was carried out with antibodies specific for ubiquitin (Ub) and αSyn phosphorylated at serine 129. Nuclei were stained with DAPI. Scale bar, 10 μm. (b) Lower magnification images showing immunofluorescence analyses of brains expressing *sp2*- and *wt*-αSyn for 4 months. Immunostaining was carried out with an antibody that recognizes αSyn phosphorylated at serine 129. a higher magnification showing the substantia nigra is shown in the bottom. Nuclei were stained with DAPI. (c) Representative WB of brain tissue enriched of midbrain from mice transduced with AAV-GFP, AAV-*wt*- or AAV-*sp2*-αSyn. An anti-αSyn antibody (clone LB509) that recognizes human but not mouse αSyn was used for the immunoblot. Note that in this experiment we used four times more material from the *sp2*-αSyn mice due to lesser overall amount of αSyn compared to *wt*-αSyn-expressing mice (see GAPDH). (d) Representative WB of brain tissue enriched of midbrain from mice transduced with AAV-*wt*- or AAV-*sp2*-αSyn and subjected to sequential extraction with the indicated buffers. The LB509 anti-αSyn antibody was used. Stck, stacking gel. Four times more material from the *sp2*-αSyn mice was used due to lesser overall amount of αSyn compared to *wt*-αSyn-expressing mice.



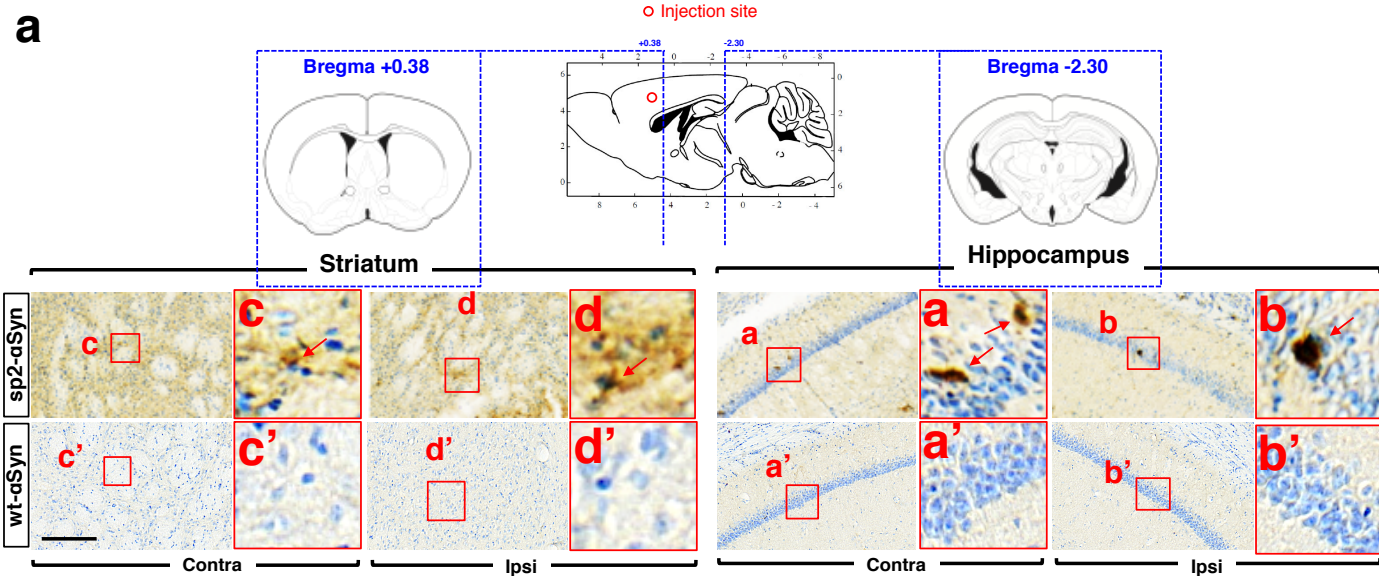

**Supplementary Figure 5. *sp2- $\alpha$ Syn* spreading in the mammalian brain.** (a) Representative IHC images of coronal brain sections of hippocampus and striatum of wild type mice that received a single injection of an AAV9 encoding *sp2-* or *wt- $\alpha$ Syn* in the cortex. Animals were sacrificed at 4 months post-surgery. In the upper part a schematic representation of the anatomical structures analyzed that includes approximate rostro-caudal coordinates with the bregma as reference. Contralateral (Contra) and ipsilateral (Ipsi) hemispheres are shown. Scale bar: 200  $\mu$ m.

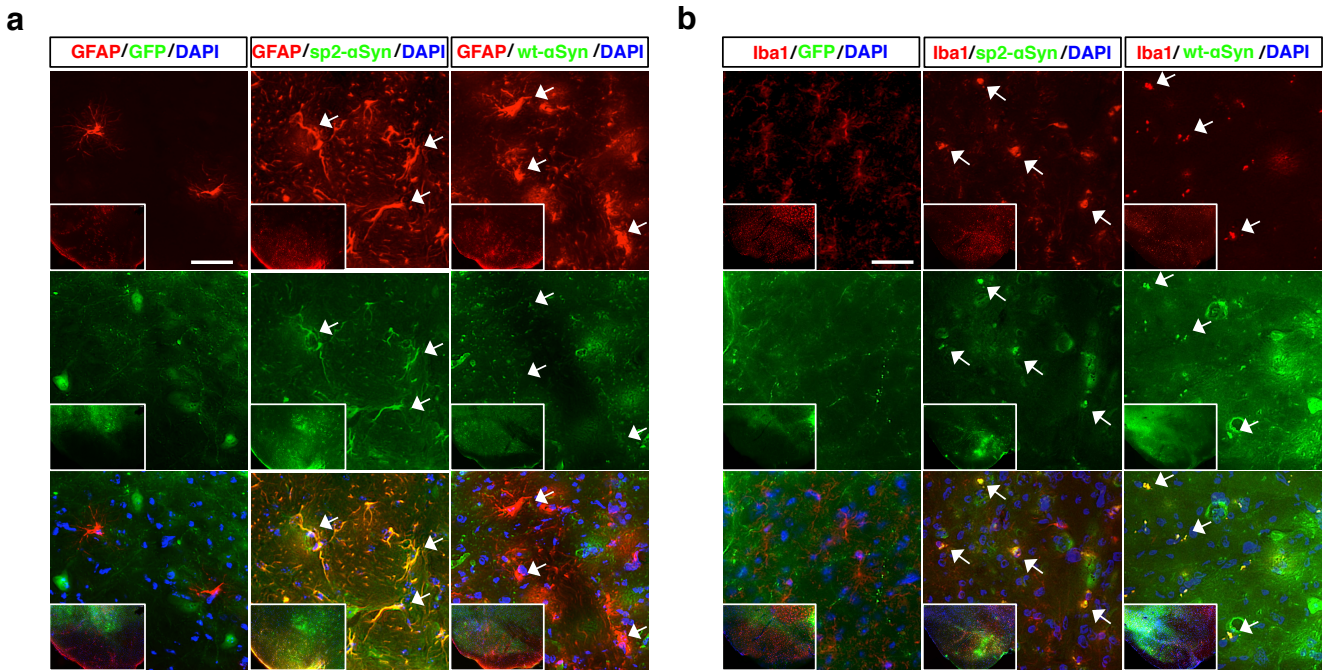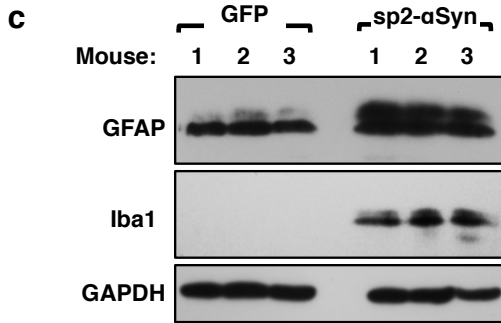

**Supplementary Figure 6. *sp2- $\alpha$ Syn* triggers neuronal death and neuroinflammation.** (a and b) Representative immunofluorescence images of the substantia nigra of mice transduced with GFP, sp2- or wt- $\alpha$ Syn AAVs for 4 months. Human  $\alpha$ Syn (green) was co-immunostained with the marker for astrocytes GFAP (a) or microglia Iba1 (b). Arrows indicate co-localization between the glial marker and  $\alpha$ Syn in astrocytes or microglia. DAPI was used for nuclear staining. Scale bar: 100  $\mu$ m. (c) Representative WB of brain tissue from mice transduced with AAV-GFP (n=3) or AAV-sp2- $\alpha$ Syn (n=3) for 4 months.

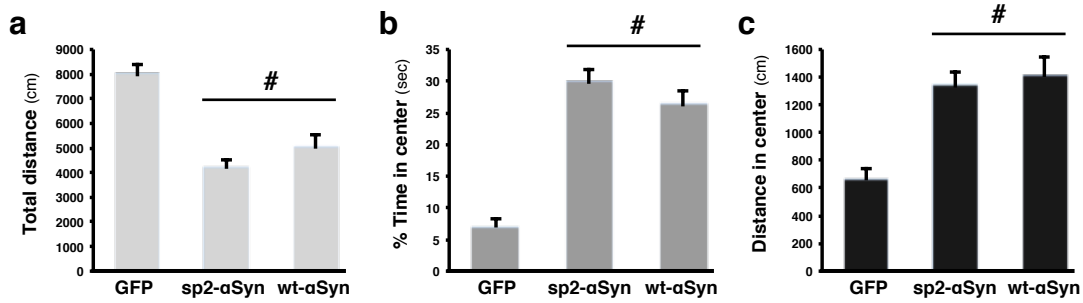

**Supplementary Figure 7. Locomotor deficits elicited by *sp2-αSyn*.** (a-c) Plots of the total distance travelled (a), time (in percentage) that the animals occupied the center (b) or distance travelled in the center (c) derived from the open field test (20 minutes sessions). Mice expressing GFP (n=6), sp2- (n=6) or wt-αSyn (n=5) for 4 months were used in this study. Data is shown as the media ± SD. #  $p < 0.05$  (one-way ANOVA followed by the *post hoc* Dunnett's test).

# Western blotting, uncropped blots

Figure 1b

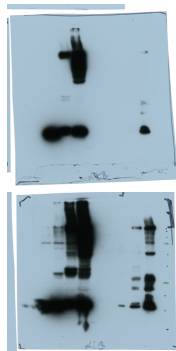

Figure 1d

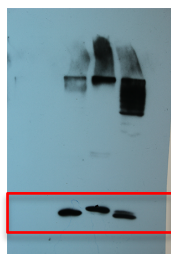

Figure 1e

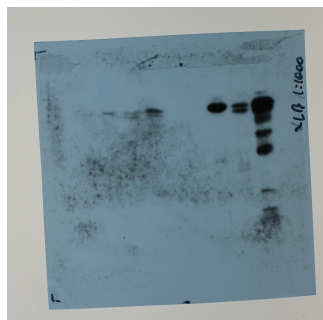

Supplem. Figure 1a

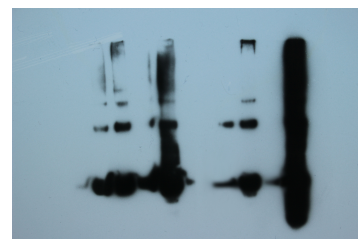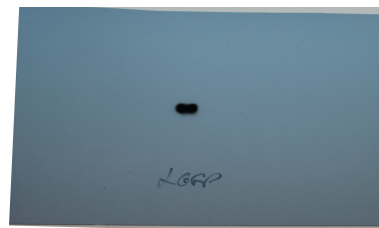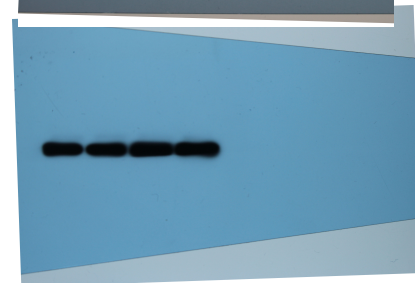

Supplem. Figure 1i

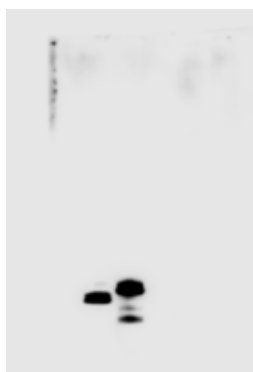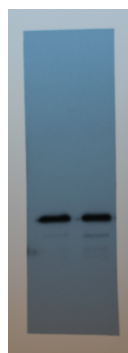

Supplem. Figure 1f

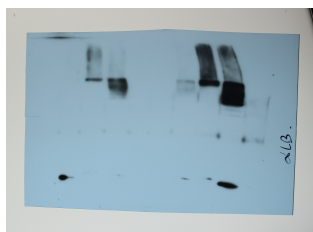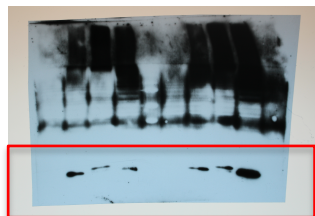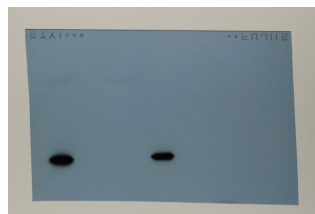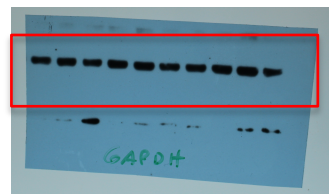

Supplem. Figure 2f

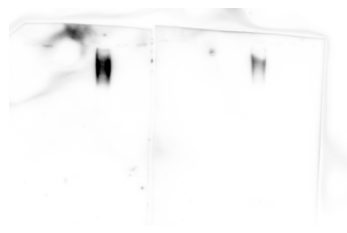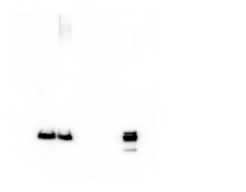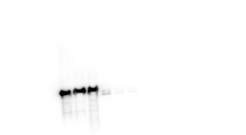

Figure 2d

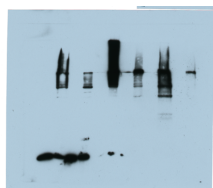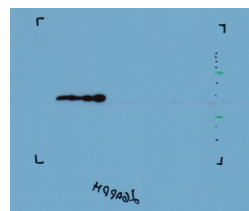

Supplem. Figure 2k

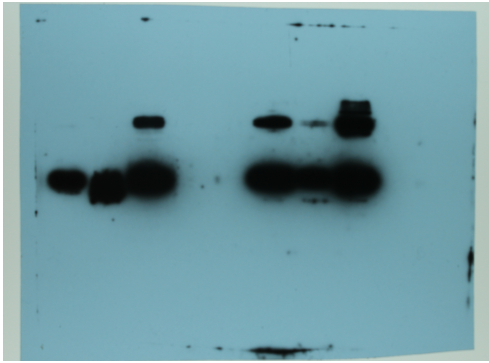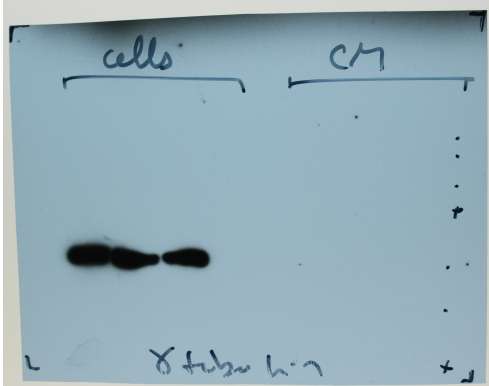

Supplem. Figure 4c

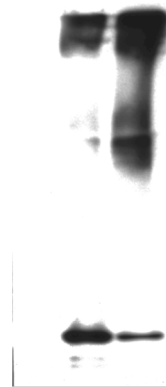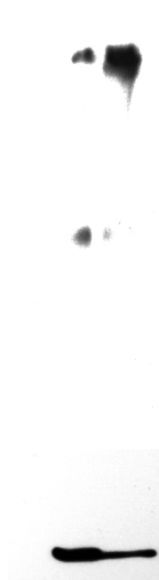

Supplem. Figure 4d

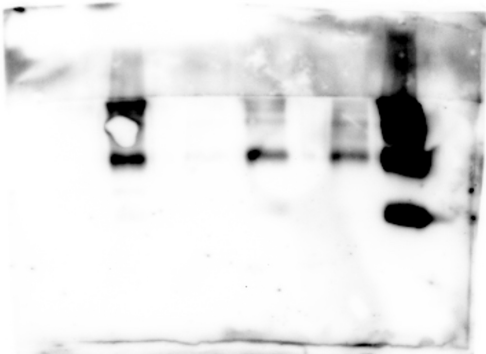



Supplem. Figure 6c

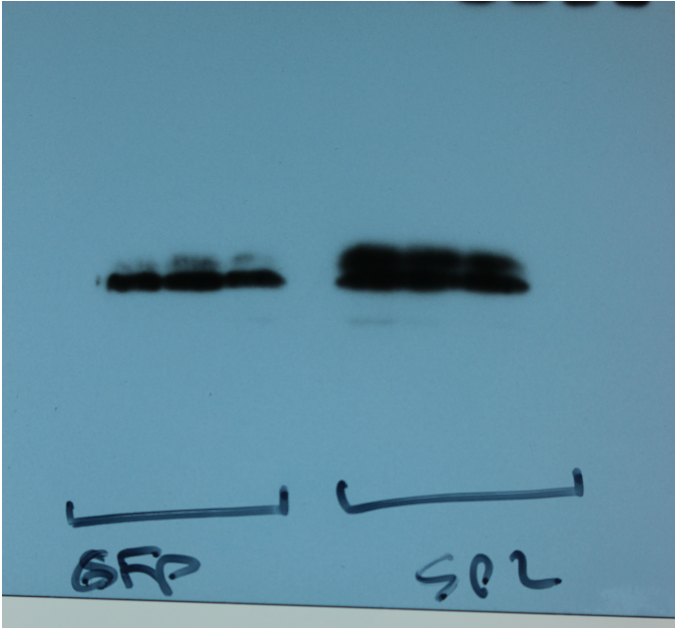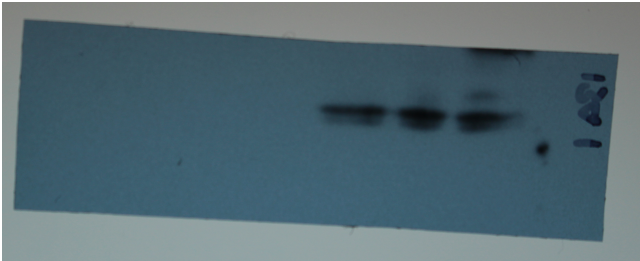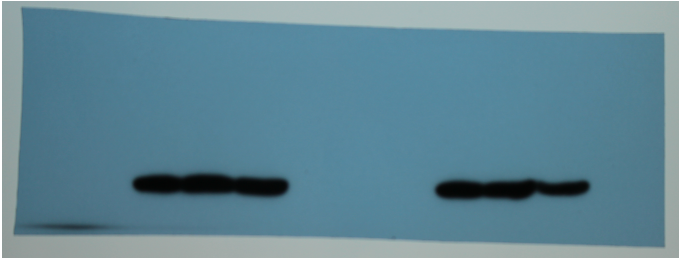

Supplement: 41531_2023_618_MOESM1_ESM.pdf [file 41531_2023_618_MOESM1_ESM.pdf]
